# Supplementary material for: HCnN anions in the ISM: exploring their existence and new paths to anionic carbonitriles for n = 3, 5
Source: Royal Society of Chemistry journal article supplement (doi:10.1039/c9cp00877b), 2019-01-01
Supplement: c9cp00877b1.pdf [file c9cp00877b1.pdf]

## Electronic Supplementary Information (ESI)

# HC<sub>n</sub>N ANIONS IN THE ISM: EXPLORING THEIR EXISTENCE AND NEW PATHS TO ANIONS CARBONITRILES FOR n=3,5

Stanka V. Jerosimić<sup>1</sup>, Roland Wester<sup>2</sup>, Franco A. Gianturco<sup>2</sup>

<sup>1</sup> Faculty of Physical Chemistry, University of Belgrade, Studentski trg 12-16, PAC 105305,  
11158 Belgrade, Serbia

<sup>2</sup> Institut für Ionenphysik und Angewandte Physik, Universität Innsbruck, Technikerstraße 25,  
6020 Innsbruck, Austria

**Table S1.** Equilibrium geometries and rotational constants of **3.n.1**, **3.a.1**, **5.n.1**, and **5.a.1**, and linear anions **3.a.lin** and **5.a.lin**, calculated at the RHF-CCSD(T)-F12/cc-pVTZ-F12 level of theory. Rotational constants are calculated from equilibrium geometries with average atomic masses.

**Table S2.** Configurational isomers of HC<sub>3</sub>N<sup>-</sup> calculated by USOGGA11X/d-aug-cc-pVTZ method. The energies and dipole moments of the neutral HC<sub>3</sub>N at the geometry of the corresponding anion are shown in parenthesis below the values for the anion. IR intensities are presented in parenthesis.

**Table S3.** Configurational isomers of HC<sub>5</sub>N<sup>-</sup> calculated by USOGGA11X/d-aug-cc-pVTZ method. The energies and dipole moments of the neutral HC<sub>5</sub>N at the geometry of the corresponding anion are shown in parenthesis below the values for the anion. IR intensities are presented in parenthesis.

**Table S4.** Electronic energies, harmonic frequencies, zero-point vibrational energies (ZPVE), and dipole moments of different states of HC<sub>3</sub>N/HC<sub>3</sub>N<sup>-</sup> system, calculated by using the theoretical models discussed in this work and listed at the end of the Table, with experimental values given in italics. In the case of the **3.a.1** system we also present (in brackets) the energy and dipole moment of the neutral at **3.a.1** geometry.

**Table S5.** Electronic energies, harmonic frequencies, zero-point vibrational energies (ZPVE), and dipole moments of different states of HC<sub>5</sub>N/HC<sub>5</sub>N<sup>-</sup> system, calculated by using various theoretical models presented in this work. Their references are at the end of Table. In the case of the **5.a.1** system we present in brackets the energy and dipole moment of the neutral at the **5.a.1** geometry.

**Table S1.** Equilibrium geometries and rotational constants of **3.n.1**, **3.a.1**, **5.n.1**, and **5.a.1**, and linear anions **3.a.lin** and **5.a.lin**, calculated at the RHF-CCSD(T)-F12/cc-pVTZ-F12 level of theory. Rotational constants are calculated from equilibrium geometries with average atomic masses.

| Species        | Geometry                                                                                                                                                                                                                                                                                                                                                                                                                     | Rotational constants / GHz            |
|----------------|------------------------------------------------------------------------------------------------------------------------------------------------------------------------------------------------------------------------------------------------------------------------------------------------------------------------------------------------------------------------------------------------------------------------------|---------------------------------------|
| <b>3.n.1</b>   | $r_{C_1H}=1.0640 \text{ \AA}$ , $r_{C_1C_2}=1.2080 \text{ \AA}$ , $r_{C_2C_3}=1.3804 \text{ \AA}$ ,<br>$r_{C_3N}=1.1624 \text{ \AA}$ ; all angles = $180^\circ$ .<br>Previous experimental results: $r_{C_1H}=1.058$ [1], $1.062$ [2];<br>$r_{C_1C_2}=1.205$ [1], $1.206$ [2]; $r_{C_2C_3}=1.378$ [1],<br>$1.376$ [2]; and $r_{C_3N}=1.159$ [1], $1.161$ [2].                                                                | 4.5270852<br>4.5270852<br>0.0000000   |
| <b>3.a.lin</b> | $r_{C_1H} = 1.0693 \text{ \AA}$ , $r_{C_1C_2} = 1.2106 \text{ \AA}$ , $r_{C_2C_3} = 1.3766 \text{ \AA}$ ,<br>$r_{C_3N} = 1.1629 \text{ \AA}$ ; all angles = $180^\circ$ .                                                                                                                                                                                                                                                    | 4.5296524<br>4.5296524<br>0.0000000   |
| <b>3.a.1</b>   | $r_{C_1H}=1.0950 \text{ \AA}$ , $r_{C_1C_2}=1.3039 \text{ \AA}$ , $r_{C_2C_3}=1.3887 \text{ \AA}$ ,<br>$r_{C_3N}=1.1780 \text{ \AA}$ , $\angle(HCC) = 123.6^\circ$ ; $\angle(CCC) =$<br>$137.4^\circ$ ; $\angle(CCN)= 173.0^\circ$ ; dihedral angles = $180^\circ$                                                                                                                                                           | 4.6514770<br>4.7682720<br>189.9010614 |
| <b>5.n.1</b>   | $r_{C_1H} = 1.0639 \text{ \AA}$ , $r_{C_1C_2} = 1.2114 \text{ \AA}$ , $r_{C_2C_3} = 1.3694 \text{ \AA}$ ,<br>$r_{C_3C_4} = 1.2151 \text{ \AA}$ , $r_{C_4C_5} = 1.3748 \text{ \AA}$ , $r_{C_5N} = 1.1639$<br>$\text{ \AA}$ ; all angles = $180^\circ$ .                                                                                                                                                                       | 1.3231222<br>1.3231222<br>0.0000000   |
| <b>5.a.lin</b> | $r_{C_1H} = 1.0679 \text{ \AA}$ , $r_{C_1C_2} = 1.2139 \text{ \AA}$ , $r_{C_2C_3} = 1.3648 \text{ \AA}$ ,<br>$r_{C_3C_4} = 1.2180 \text{ \AA}$ , $r_{C_4C_5} = 1.3715 \text{ \AA}$ , $r_{C_5N} = 1.1644$<br>$\text{ \AA}$ ; all angles = $180^\circ$ .                                                                                                                                                                       | 1.3243379<br>1.3243379<br>0.0000000   |
| <b>5.a.1</b>   | $r_{C_1H}=1.0806 \text{ \AA}$ , $r_{C_1C_2}=1.2706 \text{ \AA}$ , $r_{C_2C_3}=1.3272 \text{ \AA}$ ,<br>$r_{C_3C_4}=1.2736 \text{ \AA}$ , $r_{C_4C_5}=1.3754 \text{ \AA}$ , $r_{C_5N}=1.1768$<br>$\text{ \AA}$ , $\angle(HCC) = 134.3^\circ$ ; $\angle(C_1C_2C_3) = 168.2^\circ$ ;<br>$\angle(C_2C_3C_4) = 168.2^\circ$ , $\angle(C_3C_4C_5) = 144.1^\circ$ ; $\angle(CCN)=$<br>$174.0^\circ$ ; dihedral angles = $180^\circ$ | 1.3669609<br>1.3865222<br>96.8912467  |

[1] Dorofeeva, 1991

[2] Kuchitsu, 1998.

**Table S2.** Configurational isomers of  $\text{HC}_3\text{N}^-$  calculated by USOGGA11X/d-aug-cc-pVTZ method. The energies and dipole moments of the neutral  $\text{HC}_3\text{N}$  at the geometry of the corresponding anion are shown in parenthesis below the values for the anion. IR intensities are presented in parenthesis.

| Isomer                        | Electronic energy/ <i>a.u.</i> | Frequencies / $\text{cm}^{-1}$<br>(IR intensities, $\text{kmmol}^{-1}$ )                          | ZPVE/a.u. | Dipole moment/D  |
|-------------------------------|--------------------------------|---------------------------------------------------------------------------------------------------|-----------|------------------|
| <b>3.a.1</b><br>$^2\text{A}'$ | -169.5744563<br>(-169.5249239) | 169(7), 348(6), 524(27), 680(42),<br>871(59), 928(85),<br>1814(14), 2195(551),<br>3024(151)       | 0.024040  | 1.111<br>(3.405) |
| <b>3.a.2</b>                  | -169.562199<br>(-169.486253)   | 256(34), 439(0), 598(10),<br>705(27), 948(3), 1213(7),<br>1502(50), 2294(265),<br>2968(124)       | 0.024886  | 3.509<br>(2.995) |
| <b>3.a.3</b>                  | -169.5340407<br>(-169.4566053) | 207(12), 241(24), 420(4),<br>698(54), 908(2),<br>1122(108), 1752(178),<br>1939(547), 3221(276).   | 0.023938  | 4.350<br>(3.246) |
| <b>3.a.4</b>                  | -169.5336730<br>(-169.3519058) | 214(10), 260(0), 529(22), 898(0),<br>963(61), 1237(5),<br>1644(183), 2085(318),<br>2922(90)       | 0.024495  | 5.142<br>(4.833) |
| <b>3.a.5</b>                  | -169.529191<br>(-169.472739)   | 241(9), 327(1), 516(63), 700(52),<br>855(40), 932(99),<br>1713(12), 2117(22),<br>3104(64)         | 0.023934  | 0.878<br>(2.670) |
| <b>3.a.6</b>                  | -169.5218720<br>(-169.4437857) | 237(22), 352(0), 553(19),<br>709(24), 880(20),<br>1262(12), 1523(3),<br>2218(11), 3035(105)       | 0.024535  | 3.753<br>(2.506) |
| <b>3.a.7</b>                  | -169.5210818<br>(-169.4287570) | 419(45), 445(66), 565(14),<br>648(104), 906(22),<br>1108(188), 1528(107),<br>1777(733), 3484(23). | 0.024783  | 2.205<br>(1.111) |
| <b>3.a.8</b>                  | -169.5005510<br>(-169.4124170) | 211(29), 271(2), 420(30),<br>586(12), 931(113),<br>1052(239), 1782(107),<br>1968(455), 2848(268)  | 0.022938  | 5.267<br>(5.340) |
| <b>3.a.9</b>                  | -169.4707660<br>(-169.3911138) | 353(24), 619(25), 704(25),<br>861(11), 1030(35),<br>1107(13), 1330(22),<br>1366(13), 3032(143).   | 0.023697  | 2.894<br>(2.236) |
| <b>3.a.10</b>                 | -169.460785<br>(-169.337711)   | 213(14), 293(3), 553(25),<br>724(18), 939(22), 1375(2),<br>1518(4), 2099(111),<br>3375(2)         | 0.025263  | 5.395<br>(6.630) |

**Table S3.** Configurational isomers of  $\text{HC}_5\text{N}^-$  calculated by USOGGA11X/d-aug-cc-pVTZ method. The energies and dipole moments of the neutral  $\text{HC}_5\text{N}$  at the geometry of the corresponding anion are shown in parenthesis below the values for the anion. IR intensities are presented in parenthesis.

| Isomer                        | Electronic Energy / <i>a.u.</i> | Frequencies/ $\text{cm}^{-1}$<br>(IR intensities, $\text{kmmol}^{-1}$ )                                                                                         | ZPVE/ <i>a.u.</i> | Dipole moment/D   |
|-------------------------------|---------------------------------|-----------------------------------------------------------------------------------------------------------------------------------------------------------------|-------------------|-------------------|
| <b>5.a.1</b><br>$^2\text{A}'$ | -245.7505665<br>(-245.6904719)  | 44(1), 117(5), 232(3), 285(7),<br>383(9), 476(7), 555(0),<br>586(9), 635(95),<br>691(456), 1246(45),<br>1914(182), 2149(293),<br>2259(1096), 3191(92).          | 0.033628          | 1.5007<br>(3.779) |
| <b>5.a.2</b>                  | -245.7453192<br>(-245.6293754)  | 92(12), 174(3), 275(2), 381(1),<br>408(6), 553(1), 561(4),<br>728(37), 908(4),<br>1074(5), 1310(7),<br>1679(49), 1915(895),<br>2326(281), 3104(39),             | 0.035281          | 4.986<br>(2.137)  |
| <b>5.a.3</b>                  | -245.7169582<br>(-245.6328207)  | 115(20), 127(0), 254(35),<br>424(2), 525(28),<br>544(10), 575(10),<br>706(21), 729(3),<br>1202(5), 1225(14),<br>1472(228), 2220(243),<br>2355(1454), 2977(111). | 0.035195          | 4.489<br>(3.928)  |
| <b>5.a.4</b>                  | -245.7125671<br>(-245.6183144)  | 144(2), 234(8), 269(33),<br>440(9), 501(25),<br>537(69), 625(4), 638(0),<br>655(43), 746(1),<br>1141(8), 1454(58),<br>2188(200), 2315(184),<br>3519(68).        | 0.035094          | 4.658<br>(3.391)  |
| <b>5.a.5</b>                  | -245.7084253<br>(-245.6226443)  | 105(6), 111(7), 213(7), 250(8),<br>316(1), 400(0), 546(6),<br>588(0), 653(1),<br>1131(245), 1236(96),<br>1801(489), 1899(1471),<br>2083(560), 3419(27),         | 0.033606          | 7.075<br>(5.655)  |
| <b>5.a.6</b>                  | -245.7047472<br>(-245.5905465)  | 97(12), 174(2), 250(1), 344(1),<br>407(5), 498(0), 512(4),<br>721(29), 917(15),<br>1072(6), 1334(35),<br>1694(2), 1935(577),<br>2230(39), 3142(35)              | 0.034912          | 5.574<br>(2.089)  |
| <b>5.a.7</b>                  | -245.7006173<br>(-245.6320745)  | 104(2), 202(2), 272(40),<br>329(0), 404(211),<br>466(125), 530(7),<br>565(244), 593(45),<br>742(5), 1172(18),                                                   | 0.033654          | 1.442<br>(3.523)  |

|               |                                |                                                                                                                                                                  |          |                  |
|---------------|--------------------------------|------------------------------------------------------------------------------------------------------------------------------------------------------------------|----------|------------------|
|               |                                | 1858(236), 2096(56),<br>2136(19), 3303(16).                                                                                                                      |          |                  |
| <b>5.a.8</b>  | -245.6723402<br>(-245.5829066) | 284(64), 411(13), 580(162),<br>587(3), 618(1),<br>718(266), 809(24),<br>897(41), 961(87),<br>1066(61), 1098(1),<br>1280(16), 1440(32),<br>1765(200), 3242(34)    | 0.035896 | 1.356<br>(2.036) |
| <b>5.a.9</b>  | -245.6694167<br>(-245.5489128) | 111(0), 132(4), 420(74),<br>440(18), 518(79),<br>519(17), 544(12),<br>595(7), 668(186),<br>813(41), 1191(26),<br>1505(217), 1784(1430),<br>2200(758), 3532(104), | 0.034111 | 3.101<br>(0.393) |
| <b>5.a.10</b> | -245.6632304<br>(-245.5707224) | 135(12), 157(4), 249(5),<br>397(1), 458(106),<br>535(9), 608(58),<br>773(166), 812(74),<br>959(0), 991(25),<br>1511(223), 1817(30),<br>2251(592), 3101(87)       | 0.033617 | 3.496<br>(3.741) |

**Table S4.** Electronic energies, harmonic frequencies, zero-point vibrational energies (ZPVE), and dipole moments of different states of HC<sub>3</sub>N/HC<sub>3</sub>N<sup>-</sup> system, calculated by using the theoretical models discussed in this work and listed at the end of the Table, with experimental values given in italics. In the case of the **3.a.1** system we also present (in brackets) the energy and dipole moment of the neutral at **3.a.1** geometry.

| Isomer                                          | Electronic energy/ <i>a.u.</i>                                                                                                                                                                                                                                                                                                                                                                     | Frequencies/cm-1                                                                                                                                                                                                                                                                                                   | ZPVE/ <i>a.u.</i>                                                                                    | Dipole moment/D                                                                                                                                                                                                                             |
|-------------------------------------------------|----------------------------------------------------------------------------------------------------------------------------------------------------------------------------------------------------------------------------------------------------------------------------------------------------------------------------------------------------------------------------------------------------|--------------------------------------------------------------------------------------------------------------------------------------------------------------------------------------------------------------------------------------------------------------------------------------------------------------------|------------------------------------------------------------------------------------------------------|---------------------------------------------------------------------------------------------------------------------------------------------------------------------------------------------------------------------------------------------|
| <b>3.n.1</b><br>( <sup>1</sup> Σ <sup>+</sup> ) | -169.5672400 <sup>a)</sup><br>-169.5784335 <sup>b)</sup><br>-169.3502637 <sup>c)</sup><br>-169.3528759 <sup>d)</sup><br>-169.2903628 <sup>e)</sup><br>-169.3244578 <sup>f)</sup><br>-169.3314740 <sup>g)</sup><br>-169.2804743 <sup>h)</sup><br>-169.2902261 <sup>i)</sup><br>-169.2892771 <sup>j)</sup><br>-169.2895561 <sup>k)</sup><br>-169.2892480 <sup>l)</sup><br>-169.5667065 <sup>m)</sup> | 242(0), 242(0), 555(7), 555(7), 735(38),<br>735(38), 909(0), 2219(1),<br>2437(30), 3504(83). <sup>a)</sup><br>221, 221, 496, 496, 677, 677, 879, 2113,<br>2318, 3453. <sup>c)</sup><br>224, 224, 506, 506, 673, 673, 885, 2043,<br>2229, 3477. <sup>f)</sup><br>222, 499, 663, 864, 2079, 2274, 3327 <sup>n)</sup> | 0.027641 <sup>a)</sup><br>0.026313 <sup>c)</sup><br>0.026061 <sup>f)</sup><br>0.025771 <sup>n)</sup> | -3.912 <sup>a)</sup><br>-3.909 <sup>b)</sup><br>-3.994 <sup>g)</sup><br>-3.840 <sup>h)</sup><br>-4.182 <sup>i)</sup><br>-4.183 <sup>j)</sup><br>-4.182 <sup>k)</sup><br>-4.183 <sup>l)</sup><br>-3.929 <sup>m)</sup><br>-3.72 <sup>o)</sup> |
| <b>3.a.lin</b><br><sup>2</sup> Σ <sup>+</sup>   | -169.5686812 <sup>a)</sup><br>-169.5815316 <sup>b)</sup><br>-169.3273999 <sup>c)</sup><br>-169.3319822 <sup>d)</sup><br>-169.2881478 <sup>e)</sup><br>-169.3008507 <sup>f)</sup><br>-169.3013204 <sup>g)</sup><br>-169.2776269 <sup>h)</sup><br>-169.2879667 <sup>i)</sup><br>no conv. <sup>j)</sup><br>no conv. <sup>k)</sup><br>no conv. <sup>l)</sup><br>no conv. <sup>m)</sup>                 | 330, 330, 760, 760, 883, 902, 902,<br>2097, 2307, 3332 <sup>c)</sup><br>230, 230, 493, 493, 831, 831, 889, 2032,<br>2223, 3351. <sup>f)</sup>                                                                                                                                                                      | 0.028709 <sup>c)</sup><br>0.026436 <sup>f)</sup>                                                     | +19.622 <sup>a)</sup><br>+12.182 <sup>b)</sup><br>+15.289 <sup>g)</sup><br>+19.754 <sup>h)</sup><br>+19.868 <sup>i)</sup>                                                                                                                   |
| <b>3.a.1</b><br><sup>2</sup> A'                 | -169.5744563 <sup>a)</sup><br>(-169.5249239)<br><sup>a)</sup><br>-169.5837159 <sup>b)</sup><br>-169.3502936 <sup>c)</sup><br>-169.3530713 <sup>d)</sup><br>(-169.3129127)<br><sup>d)</sup><br>-169.2902153 <sup>e)</sup><br>-169.3247399 <sup>f)</sup><br>-169.2905820 <sup>i)</sup><br>-169.2893629 <sup>j)</sup><br>-169.5737715 <sup>m)</sup>                                                   | 169(7), 348(6), 524(27), 680(42),<br>871(59), 928(85), 1814(14),<br>2195(551), 3024(151) <sup>a)</sup><br>227, 371, 546, 680, 866, 941, 1714,<br>2132, 3003. <sup>c)</sup><br>218, 345, 511, 687, 880, 1527, 1727,<br>2094, 3026 <sup>f)</sup>                                                                     | 0.024040 <sup>a)</sup><br>0.023874 <sup>c)</sup><br>0.025092 <sup>f)</sup>                           | 1.111 <sup>a)</sup><br>(3.405) <sup>a)</sup><br>0.919 <sup>i)</sup><br>0.922 <sup>j)</sup><br>0.991 <sup>m)</sup>                                                                                                                           |

a) USOGGA11X/d-aug-cc-pVTZ

b) USOGGA11X/d-aug-cc-pVQZ//RCCSD(T)-F12/cc-pVTZ-F12

c) RCCSD(T)-F12a/cc-pVTZ-F12

- d) RCCSD(T)-F12a/cc-pVQZ-F12// RCCSD(T)-F12/cc-pVTZ-F12
- e) RCCSD(T)/d-aug-cc-pVTZ// RCCSD(T)-F12/cc-pVTZ-F12
- f) RMP2-F12/cc-pVTZ-F12
- g) CAS-MRCISD(Q)-F12/cc-pVTZ-F12// RCCSD(T)-F12/cc-pVTZ-F12
- h) CAS-MRCISD(Q)/d-aug-cc-pVTZ// RCCSD(T)-F12/cc-pVTZ-F12
- i) UHF-CCSD(T)/d-aug-cc-pVTZ// RCCSD(T)-F12/cc-pVTZ-F12
- j) UHF-CCSD(T)/aug-cc-pVTZ+4(sp)// RCCSD(T)-F12/cc-pVTZ-F12
- k) UHF-CCSD(T)/aug-cc-pVTZ+4(sp)1d// RCCSD(T)-F12/cc-pVTZ-F12
- l) UHF-CCSD(T)/aug-cc-pVTZ+4(sp)H+1(s,p)C,N// RCCSD(T)-F12/cc-pVTZ-F12
- m) USOGGA11X/ aug-cc-pVTZ+4(sp)1d// RCCSD(T)-F12/cc-pVTZ-F12
- n) [3]
- o) [4]; [5]

**Table S5.** Electronic energies, harmonic frequencies, zero-point vibrational energies (ZPVE), and dipole moments of different states of HC<sub>5</sub>N/HC<sub>5</sub>N<sup>-</sup> system, calculated by using various theoretical models presented in this work. Their references are at the end of Table. In the case of the **5.a.1** system we present in brackets the energy and dipole moment of the neutral at the **5.a.1** geometry.

| Isomer                                        | Electronic energy/a.u.                                                                                                                                                                                                                                                                                                                 | Frequencies / cm-1                                                                                                                                                                                                     | ZPVE/a.u.                                                                  | Dipole moment/D                                                                                                                                                                              |
|-----------------------------------------------|----------------------------------------------------------------------------------------------------------------------------------------------------------------------------------------------------------------------------------------------------------------------------------------------------------------------------------------|------------------------------------------------------------------------------------------------------------------------------------------------------------------------------------------------------------------------|----------------------------------------------------------------------------|----------------------------------------------------------------------------------------------------------------------------------------------------------------------------------------------|
| Neutral<br><sup>1</sup> Σ <sup>+</sup>        | -245.7183235 <sup>a)</sup><br>-245.7334428 <sup>b)</sup><br>-245.3906561 <sup>c)</sup><br>-245.3944063 <sup>d)</sup><br>-245.3561761 <sup>e)</sup><br>-245.3324649 <sup>f)</sup><br>-245.3049575 <sup>g)</sup><br>-245.3030309 <sup>h)</sup><br>-245.3035067 <sup>i)</sup><br>-245.3029722 <sup>j)</sup><br>-245.7174895 <sup>k)</sup> | 106, 106, 247, 247, 447, 447, 474,<br>474, 609, 657, 657, 1164,<br>2098, 2233, 2320, 3452. <sup>c)</sup><br><br>97, 97, 248, 248, 458, 458, 483,<br>483, 614, 643, 643, 1178,<br>2026, 2149, 2223, 3473. <sup>e)</sup> | 0.038031 <sup>a)</sup><br>0.035856 <sup>c)</sup><br>0.035361 <sup>e)</sup> | -4.648 <sup>a)</sup><br>-4.668 <sup>b)</sup><br>-5.033 <sup>f)</sup><br>-4.888 <sup>g)</sup><br>-4.888 <sup>h)</sup><br>-4.888 <sup>i)</sup><br>-4.888 <sup>j)</sup><br>-4.674 <sup>k)</sup> |
| <b>5.a.lin</b><br><sup>2</sup> Σ <sup>+</sup> | -245.7273446 <sup>b)</sup><br>-245.3710823 <sup>c)</sup><br>-245.3764349 <sup>d)</sup><br>-245.3358805 <sup>e)</sup><br>-245.3055020 <sup>f)</sup><br>-245.3035343 <sup>g)</sup><br>-245.3036148 <sup>h)</sup><br>-245.3040947 <sup>i)</sup><br>-245.3035563 <sup>j)</sup><br>no conv. <sup>k)</sup>                                   | 74, 74, 174, 174, 275, 276, 533,<br>533, 617, 741, 741, 1186,<br>2013, 2146, 2214, 3368. <sup>e)</sup>                                                                                                                 | 0.034487 <sup>e)</sup>                                                     | +16.099 <sup>b)</sup><br>+19.399 <sup>f)</sup><br>+23.859 <sup>g)</sup><br>+65.109 <sup>h)</sup><br>+65.111 <sup>i)</sup><br>+55.817 <sup>j)</sup>                                           |
| <b>5.a.1</b><br><sup>2</sup> A'               | -245.7505667 <sup>a)</sup><br>(-245.6904719) <sup>a)</sup><br>-245.7627827 <sup>b)</sup><br>-245.4126438 <sup>c)</sup><br>-245.4165681 <sup>d)</sup><br>(-245.3617062) <sup>d)</sup><br>-245.3810656 <sup>e)</sup><br>-245.3266112 <sup>g)</sup><br>-245.3247451 <sup>h)</sup><br>-245.7489382 <sup>k)</sup>                           | 195, 317, 318, 408, 424, 477, 558,<br>662, 666, 939, 1230, 1849,<br>2032, 2189, 3248. <sup>e)</sup>                                                                                                                    | 0.033628 <sup>a)</sup><br>0.035337 <sup>e)</sup>                           | 1.501 <sup>a)</sup><br>(3.779) <sup>a)</sup><br>1.652 <sup>b)</sup><br>2.109 <sup>g)</sup><br>2.111 <sup>j)</sup><br>1.904 <sup>k)</sup>                                                     |

a) USOGGA11X/d-aug-cc-pVTZ

b) SOGGA11X/aug-cc-pVQZ//RCCSD(T)-F12/cc-pVTZ-F12

c) RCCSD(T)-F12a/cc-pVTZ-F12

d) RCCSD(T)-F12a/cc-pVQZ-F12// RCCSD(T)-F12/cc-pVTZ-F12

e) RMP2-F12/cc-pVTZ-F12

f) CAS-MRCISD(Q)-F12/cc-pVTZ-F12// RCCSD(T)-F12/cc-pVTZ-F12

g) UHF-CCSD(T)/d-aug-cc-pVTZ// RCCSD(T)-F12/cc-pVTZ-F12

h) UHF-CCSD(T)/aug-cc-pVTZ+4(sp)// RCCSD(T)-F12/cc-pVTZ-F12

i) UHF-CCSD(T)/aug-cc-pVTZ+4(sp)1d// RCCSD(T)-F12/cc-pVTZ-F12

j) UHF-CCSD(T)/aug-cc-pVTZ+4(sp)H+1(s,p)C,N// RCCSD(T)-F12/cc-pVTZ-F12

k) USOGGA11X/ aug-cc-pVTZ+4(sp)1d// RCCSD(T)-F12/cc-pVTZ-F12



**References:**

- [1] Dorofeeva O. V., Gurvich L. V., *Thermochim. Acta* 178 (1991) 273–286.
- [2] Kuchitsu K, Ed., 1998, *Structure of Free Polyatomic Molecules*
- [3] A. Scemama, P. Chaquin, M.C. Gazeau, Y. Bénilan, *J. Phys. Chem. A* 106 (2002) 3828–3837.
- [4] D. R. Lide, Ed., *CRC Handbook of Chemistry and Physics, Internet Version 2005*, <  
<http://www.hbcpNetbase.com> >, CRC Press, Boca Raton, FL, 2005
- [5] A. Arnau, I. Tunon, E. Silla, J.M. Andres, *J. Chem. Educ.* 67 (1990) 905.
